# Supplementary material
Source: PubMed Central journal article supplement (PMC3428876)
Supplement: NIHMS49378-supplement-supp1.pdf [file NIHMS49378-supplement-supp1.pdf]

## CHARACTERISTICS OF STUDIES

### Characteristics of included studies [ordered by study ID]

#### Burns 2007

|               |                                                                                                                                                                                                                                                                                                                                                                                                                                                                            |
|---------------|----------------------------------------------------------------------------------------------------------------------------------------------------------------------------------------------------------------------------------------------------------------------------------------------------------------------------------------------------------------------------------------------------------------------------------------------------------------------------|
| Methods       | Randomised controlled trial                                                                                                                                                                                                                                                                                                                                                                                                                                                |
| Participants  | 170 patients over 60 years old who have undergone surgery for hip fracture in orthopaedic units in Manchester, UK, in the previous 2 weeks and who were not depressed (scored 6 or less on the Geriatric Depression Scale (GDS)). 85 in the intervention group and 85 control. Mean age 81 years and 50% were female                                                                                                                                                       |
| Interventions | Up to 7 sessions of individual CBT delivered by an assistant psychologist, supervised by a clinical psychologist versus treatment as usual                                                                                                                                                                                                                                                                                                                                 |
| Outcomes      | Primary outcome (assessed at 6 weeks): <ul style="list-style-type: none"> <li>• Depression: Hospital Anxiety and Depression Scale (HADS)</li> </ul> Other outcomes assessed at 6 weeks, 3 and 6 months: <ul style="list-style-type: none"> <li>• Fear of falling: Modified Falls Efficacy Scale</li> <li>• Pain: short form McGill pain questionnaire and the Wong-Baker pain rating scale</li> <li>• Mobility: Timed-Up-and-Go Test and the modified gait test</li> </ul> |
| Notes         | The trial had a separate arm for patients who scored over 6 on the GDS. As these patients had been screened for depression and the CBT was administered to treat rather than prevent depression, this arm of the trial was excluded from this review                                                                                                                                                                                                                       |

#### *Risk of bias*

| Item                                               | Authors' judgement | Description                                                                                                                                                                                                                                                |
|----------------------------------------------------|--------------------|------------------------------------------------------------------------------------------------------------------------------------------------------------------------------------------------------------------------------------------------------------|
| Adequate sequence generation?                      | Yes                | Computer generated randomisation stratified by hospital, block size 4                                                                                                                                                                                      |
| Allocation concealment?                            | Yes                | Independent central telephone randomisation scheme.                                                                                                                                                                                                        |
| Incomplete outcome data addressed?<br>All outcomes | Unclear            | 6-week follow up available for 75% of intervention group and 84% of treatment as usual group. No significant differences in baseline characteristics of those lost to follow up and those included<br>3-month follow up: 66.5% and 6-month follow up 64.7% |
| Free of selective reporting?                       | No                 | No reporting of questionnaires other than HADS and new measures not previously introduced. Non-significant effect estimates and many 6-month outcomes not reported                                                                                         |

**Burns 2007** (Continued)

|                                 |         |                                                                                                                                                                                                                                                                                                                                                                                                                                                      |
|---------------------------------|---------|------------------------------------------------------------------------------------------------------------------------------------------------------------------------------------------------------------------------------------------------------------------------------------------------------------------------------------------------------------------------------------------------------------------------------------------------------|
| Free of other bias?             | No      | 1. Selection of non-depressed via the GDS may reduce effectiveness of intervention by restricting the sample to those at low risk of depression<br>2. Use of anti-depressants in intervention and treatment as usual groups questions validity of psychometrics and/or clinical judgement and creates commonality between groups thereby possibly reducing intervention effect size<br>3. Small sample size and lack of power for secondary outcomes |
| Intention to Treat analysis?    | Yes     | -                                                                                                                                                                                                                                                                                                                                                                                                                                                    |
| Blinding of outcome assessment? | Unclear | Insufficient information                                                                                                                                                                                                                                                                                                                                                                                                                             |

**Holmes 2007**

|               |                                                                                                                                                                                                                                                                                                                                                                                                                                                                                                                                              |
|---------------|----------------------------------------------------------------------------------------------------------------------------------------------------------------------------------------------------------------------------------------------------------------------------------------------------------------------------------------------------------------------------------------------------------------------------------------------------------------------------------------------------------------------------------------------|
| Methods       | Randomised controlled trial.                                                                                                                                                                                                                                                                                                                                                                                                                                                                                                                 |
| Participants  | All patients admitted to 2 trauma centres in Melbourne, Australia, over an 18-month period, who were 18 years or older and had suffered a major physical trauma (defined as one or more of Injury Severity Score > 15; serious injury to 2 or more body systems; urgent surgery for non-limb injuries; or injuries requiring mechanical ventilation for > 24 hours) were eligible<br>90/146 eligible patients randomised (51 intervention, 39 control). Mean age 37 years, 69.3% male                                                        |
| Interventions | Interpersonal Counselling (IPC), from clinical psychologists with specific training in IPC. Mean number of sessions 5.9 (SD = 1.1). Treatment as usual comprised seeking help for psychological distress through primary care. On average the control group received an average of 22.6 hours of non-specific psychological support (physical and occupational) and saw a psychologist or psychiatrist for a mean of 0.8 hours                                                                                                               |
| Outcomes      | Outcomes assessed at 3 and 6 months: <ul style="list-style-type: none"> <li>• Psychiatric diagnosis: Structured Clinical Interview for DSM IV (SCID)</li> <li>• Depression and anxiety: Beck Depression Inventory, Hospital Anxiety and Depression Scale</li> <li>• PTSD: Post-Traumatic Checklist</li> <li>• Alcohol use: Alcohol Use Disorders Identification Test</li> <li>• Pain: visual analogue pain scale</li> </ul> Outcome assessed at 6 months: <ul style="list-style-type: none"> <li>• Health related function: SF-36</li> </ul> |
| Notes         | The authors state that “The mean hours of specific psychological intervention (other than IPC) and non-specific therapy did not differ between the groups”, the meaning of this is unclear, especially as regards the nature of other types of “specific psychological intervention” that were used as part of treatment as usual                                                                                                                                                                                                            |

***Risk of bias***

**Holmes 2007** (Continued)

| Item                                               | Authors' judgement | Description                                                                                                                                                                                                                                                                                                                                                                      |
|----------------------------------------------------|--------------------|----------------------------------------------------------------------------------------------------------------------------------------------------------------------------------------------------------------------------------------------------------------------------------------------------------------------------------------------------------------------------------|
| Adequate sequence generation?                      | Yes                | Computer generated. Intervention allocated in a ratio of 5:4 in expectation of greater losses to follow up in intervention group                                                                                                                                                                                                                                                 |
| Allocation concealment?                            | Yes                | Research officer made blinded selection from a box of sealed envelopes                                                                                                                                                                                                                                                                                                           |
| Incomplete outcome data addressed?<br>All outcomes | No                 | Differential losses to follow up may have affected results with only 53% (27/51) of intervention group completing IPC therapy and available for 6-month follow up compared to 80% (31/39) of the control group. No significant differences between those lost to follow up and those with complete follow up, and those who did and did not complete the intervention            |
| Free of selective reporting?                       | Yes                | -                                                                                                                                                                                                                                                                                                                                                                                |
| Free of other bias?                                | No                 | 1. The intervention group received less 'intervention time' in terms of psychological support than the control group (mean = 5.9 hours versus 22.6 hours)<br>2. Participants who commenced but failed to complete therapy had significantly higher alcohol use than those who completed<br>3. Low power due to small sample size and high rate of drop-out in intervention group |
| Intention to Treat analysis?                       | No                 | -                                                                                                                                                                                                                                                                                                                                                                                |
| Blinding of outcome assessment?                    | Unclear            | Psychiatric diagnosis (primary outcome) assessor blinded at 6 months follow-up. other outcomes not blinded                                                                                                                                                                                                                                                                       |

**Pirente 2007**

|               |                                                                                                                                                                                                                                                                                                                                                                                                                                        |
|---------------|----------------------------------------------------------------------------------------------------------------------------------------------------------------------------------------------------------------------------------------------------------------------------------------------------------------------------------------------------------------------------------------------------------------------------------------|
| Methods       | Randomised controlled trial.                                                                                                                                                                                                                                                                                                                                                                                                           |
| Participants  | 171 patients admitted to 2 trauma centres in Cologne, Germany with at least 2 injuries with a combined Abbreviated Injury Scale score of $\geq 6$ , aged between 18 and 70 years, well orientated in time/person/location at time of contact. 171/184 eligible patients randomised (83 = intervention, 88 = control). Complete outcome data available for 92 patients (45 = intervention, 47 = control). 70.7% male, mean age 38 years |
| Interventions | CBT of up to 8 sessions given by a research psychologist trained in CBT with a maximum of 3 sessions per week. Compared to a treatment as usual group (standard hospital care without formal psychosocial intervention). Control groups told they would not receive CBT intervention                                                                                                                                                   |

Pirente 2007 (Continued)

|                                                    |                                                                                                                                                                                                                                                                                                                                                                                                                                                                                                                                                                                                     |                                                                                                                                                                                                                                                                                                                                                                                                                                                                                 |
|----------------------------------------------------|-----------------------------------------------------------------------------------------------------------------------------------------------------------------------------------------------------------------------------------------------------------------------------------------------------------------------------------------------------------------------------------------------------------------------------------------------------------------------------------------------------------------------------------------------------------------------------------------------------|---------------------------------------------------------------------------------------------------------------------------------------------------------------------------------------------------------------------------------------------------------------------------------------------------------------------------------------------------------------------------------------------------------------------------------------------------------------------------------|
| Outcomes                                           | <p>Primary outcome measured at discharge, and at 6 and 12 months:</p> <ul style="list-style-type: none"> <li>Health Related Quality of Life (HLQOL) composite sum score comprised of parts of several questionnaires: Short Form Health Survey Questionnaire (SF-36); Symptom Check-list-90; Beck Depression Inventory (BDI); State-Trait Anxiety Inventory (STAI) and the social support questionnaire (F-SOZU)</li> </ul> <p>Secondary outcomes measured at discharge and at 6 and 12 months:</p> <ul style="list-style-type: none"> <li>Depression and anxiety: BDI, SCL90-R and STAI</li> </ul> |                                                                                                                                                                                                                                                                                                                                                                                                                                                                                 |
| Notes                                              |                                                                                                                                                                                                                                                                                                                                                                                                                                                                                                                                                                                                     |                                                                                                                                                                                                                                                                                                                                                                                                                                                                                 |
| <b>Risk of bias</b>                                |                                                                                                                                                                                                                                                                                                                                                                                                                                                                                                                                                                                                     |                                                                                                                                                                                                                                                                                                                                                                                                                                                                                 |
| <b>Item</b>                                        | <b>Authors' judgement</b>                                                                                                                                                                                                                                                                                                                                                                                                                                                                                                                                                                           | <b>Description</b>                                                                                                                                                                                                                                                                                                                                                                                                                                                              |
| Adequate sequence generation?                      | Yes                                                                                                                                                                                                                                                                                                                                                                                                                                                                                                                                                                                                 | Computer generated, stratified for hospital and for mild or no brain injury                                                                                                                                                                                                                                                                                                                                                                                                     |
| Allocation concealment?                            | Yes                                                                                                                                                                                                                                                                                                                                                                                                                                                                                                                                                                                                 | Central allocation.                                                                                                                                                                                                                                                                                                                                                                                                                                                             |
| Incomplete outcome data addressed?<br>All outcomes | No                                                                                                                                                                                                                                                                                                                                                                                                                                                                                                                                                                                                  | Substantial losses to follow up with complete outcome data only available for 92/171 patients randomised. Reasons for losses explained and no significant differences in demographic characteristics were found between those lost to follow up and those with complete follow up                                                                                                                                                                                               |
| Free of selective reporting?                       | No                                                                                                                                                                                                                                                                                                                                                                                                                                                                                                                                                                                                  | Effect estimates for social aspects, pain and physical functioning not reported                                                                                                                                                                                                                                                                                                                                                                                                 |
| Free of other bias?                                | Unclear                                                                                                                                                                                                                                                                                                                                                                                                                                                                                                                                                                                             | <p>1. Levels of depression and anxiety at baseline were significantly higher for the intervention compared to the control group. Both intervention and control groups improved, but between group differences were not significant. It may be that the intervention is more effective in treating more severe psychological problems than is the control</p> <p>2. Rationale for selection of composite HRQOL measure not given. Use of individual scales may be more valid</p> |
| Intention to Treat analysis?                       | No                                                                                                                                                                                                                                                                                                                                                                                                                                                                                                                                                                                                  | Analyses only performed on the 92 patients with complete data rather than on the 171 patients who were randomised                                                                                                                                                                                                                                                                                                                                                               |
| Blinding of outcome assessment?                    | Yes                                                                                                                                                                                                                                                                                                                                                                                                                                                                                                                                                                                                 | Outcomes were assessed using a self-completion postal questionnaire                                                                                                                                                                                                                                                                                                                                                                                                             |

## Turpin 2005

|               |                                                                                                                                                                                                                                                                                                                                                                                        |
|---------------|----------------------------------------------------------------------------------------------------------------------------------------------------------------------------------------------------------------------------------------------------------------------------------------------------------------------------------------------------------------------------------------|
| Methods       | Randomised controlled trial.                                                                                                                                                                                                                                                                                                                                                           |
| Participants  | 291 patients 16 to 65 years old who attended Accident and Emergency (A&E) in Sheffield UK who had sustained an injury due to a road traffic accident, occupational injury or assault. 54 in intervention group (34 female, mean age 40), 46 in control group (36, female, mean age 37)<br>Baseline data collected within 2 weeks of A&E admission after which patients were randomised |
| Interventions | Self-help information booklet (8 pages, 550 words) entitled to 'Response to Traumatic Injury', describing and normalising physiological, psychological and behavioural reactions to traumatic injury. Intervention group patients sent a self-help booklet within 6 to 8 weeks of attendance; control group sent letter without information booklet                                    |
| Outcomes      | Outcomes assessed at 3 and 6 months: <ul style="list-style-type: none"> <li>• PTSD: Post-Traumatic Diagnostic Scale</li> <li>• Depression and anxiety: Hospital Anxiety and Depression Scale</li> </ul>                                                                                                                                                                                |
| Notes         | There is no indication of what the control group were told, but it is stated that "control participants were offered a copy of the self-help booklet at the end of the study". Given that the intervention had no positive effect, but did have some negative effects, the rationale for offering the booklets is unclear                                                              |

### *Risk of bias*

| Item                                               | Authors' judgement | Description                                                                                                                                                                                                                                                                                                                                                                                                                                                                                             |
|----------------------------------------------------|--------------------|---------------------------------------------------------------------------------------------------------------------------------------------------------------------------------------------------------------------------------------------------------------------------------------------------------------------------------------------------------------------------------------------------------------------------------------------------------------------------------------------------------|
| Adequate sequence generation?                      | Yes                | Random number tables.                                                                                                                                                                                                                                                                                                                                                                                                                                                                                   |
| Allocation concealment?                            | Yes                | Masked independent investigator.                                                                                                                                                                                                                                                                                                                                                                                                                                                                        |
| Incomplete outcome data addressed?<br>All outcomes | No                 | Reasons for losses to follow up stated. Significant differences in baseline characteristics between responders and non-responders and in the demographic characteristics (age and sex) of those lost to follow up and those with complete data                                                                                                                                                                                                                                                          |
| Free of selective reporting?                       | Yes                | -                                                                                                                                                                                                                                                                                                                                                                                                                                                                                                       |
| Free of other bias?                                | No                 | <ol style="list-style-type: none"> <li>1. There was a significantly higher proportion of assaults and occupational injuries in non-responders, and of road traffic accidents in responders</li> <li>2. Non-responders were significantly younger and more likely to be male</li> <li>3. Only 10% of those eligible agreed to participate (291/2818)</li> <li>4. An administrative error required 66 of 291 participants who had completed baseline measures, to be removed from the analysis</li> </ol> |

**Turpin 2005** (Continued)

|                                 |     |                                                                     |
|---------------------------------|-----|---------------------------------------------------------------------|
| Intention to Treat analysis?    | Yes | Main results reported are not from the intention-to-treat analysis  |
| Blinding of outcome assessment? | Yes | Outcomes were assessed using a self-completion postal questionnaire |

**Zatzick 2001**

|               |                                                                                                                                                                                                                                                                                                                                                                                                                                                                                                                                                                                                                                                                 |
|---------------|-----------------------------------------------------------------------------------------------------------------------------------------------------------------------------------------------------------------------------------------------------------------------------------------------------------------------------------------------------------------------------------------------------------------------------------------------------------------------------------------------------------------------------------------------------------------------------------------------------------------------------------------------------------------|
| Methods       | Randomised controlled trial.                                                                                                                                                                                                                                                                                                                                                                                                                                                                                                                                                                                                                                    |
| Participants  | 34 road traffic accident or assault related injured patients admitted to a trauma centre in California USA aged between 14 and 65 years and English speaking. 16 in intervention group (8 female, mean age 35.3), 18 in control (33% female, mean age 32.5).                                                                                                                                                                                                                                                                                                                                                                                                    |
| Interventions | Collaborative care intervention comprising a personally assigned trauma support specialist (1 of 2 psychiatrists or a clinical nurse specialist) who provided support to participants as inpatients and subsequently as outpatients during community rehabilitation. Their role was to facilitate patient-provider treatment planning, and to elicit and track patients post-traumatic concerns. In addition the intervention group received a brief psycho-educational intervention targeting PTSD and substance use. Trauma support specialists spent on average 91 minutes over 4 months with each patient. Control participants received treatment as usual |
| Outcomes      | Primary outcomes measured at 1 and 4 months post-injury: <ul style="list-style-type: none"> <li>• PTSD using a modified form of the Post-Traumatic Stress Disorder Checklist (PCL-C)</li> <li>• Depressive symptoms using a modified form of the Centre for Epidemiological Studies Depression Scale (CES-D)</li> <li>• At-risk drinking using a single question from the Addiction Severity Index (ASI)</li> <li>• Physical functioning using a modified form of the Physical Components Summary (PCS)</li> </ul>                                                                                                                                              |
| Notes         | <ol style="list-style-type: none"> <li>1. Pilot study.</li> <li>2. Both the intervention and control participants demonstrated high levels of PTSD and depressive symptoms while in hospital</li> <li>3. "There were difficulties in implementing the collaborative care principles of continuous case management and active sustained follow-up" and the success of doing so seems to have varied, with those without insurance receiving less integrated care</li> </ol>                                                                                                                                                                                      |

***Risk of bias***

| Item                          | Authors' judgement | Description                                                                 |
|-------------------------------|--------------------|-----------------------------------------------------------------------------|
| Adequate sequence generation? | Yes                | Computer generated algorithm using block randomisation with block size of 6 |
| Allocation concealment?       | Yes                | Independent project co-ordinator conducted randomisation.                   |

**Zatzick 2001** (Continued)

|                                                    |     |                                                                                                                                                                                                    |
|----------------------------------------------------|-----|----------------------------------------------------------------------------------------------------------------------------------------------------------------------------------------------------|
| Incomplete outcome data addressed?<br>All outcomes | Yes | Reasons for losses to follow up stated. No significant differences between responders and non-responders                                                                                           |
| Free of selective reporting?                       | No  | Effect estimates for at-risk drinking and functional limitations not reported (stated as non significant)                                                                                          |
| Free of other bias?                                | No  | Inpatient length of stay was significantly longer for the intervention group than the control groups (10.6 versus 5.6 days). It is not stated that this was entered as a covariate in the analysis |
| Intention to Treat analysis?                       | Yes | -                                                                                                                                                                                                  |
| Blinding of outcome assessment?                    | Yes | Research associates conducting follow-up outcome assessment interviews were blinded to intervention status                                                                                         |

A&E = accident and emergency  
 CBT = cognitive behavioural therapy  
 GDS = Geriatric Depression Scale  
 HADS = Hospital Anxiety and Depression Scale  
 HRQOL = health-related quality of life  
 PTSD = post-traumatic stress disorder  
 SCID = Structured Clinical Interview for DSM IV

**Characteristics of excluded studies** [ordered by study ID]

| Study           | Reason for exclusion                                                                    |
|-----------------|-----------------------------------------------------------------------------------------|
| Allen 1996      | Treatment not prevention study as patients had not suffered from a recent injury        |
| Andersson 2005  | Not RCT (randomisation of 2 hospitals)                                                  |
| Bisson 2004     | Treatment of PTSD                                                                       |
| Bordow 1979     | Not RCT (sequential allocation to groups). Same study as <a href="#">Porritt 1979</a> . |
| Bryant 1998     | Treatment of acute stress disorder                                                      |
| Bugg (in press) | Patients only selected for trial if suffering from acute stress disorder                |
| Castillo 2002   | Only around 20% of the patients have suffered an injury (patients in intensive care)    |
| Christakou 2007 | Treatment of ankle sprain, not prevention of disability arising from injury             |

(Continued)

|                       |                                                                                                                                                                                                            |
|-----------------------|------------------------------------------------------------------------------------------------------------------------------------------------------------------------------------------------------------|
| Corey 1996            | Complex intervention including physiotherapy, work conditioning and counselling. Unable to disaggregate effects of psychosocial component. Update of <a href="#">Mitchell 1994</a> .                       |
| Craig 1998            | Not RCT                                                                                                                                                                                                    |
| Cramer 2007           | Not RCT                                                                                                                                                                                                    |
| Cupal 2001            | Treatment of anterior cruciate ligament injuries                                                                                                                                                           |
| Drechsel-Schlund 2003 | Patients only included in trial if at high risk of Post Traumatic Stress Disorder (PTSD)                                                                                                                   |
| Dunn 2003             | Not RCT                                                                                                                                                                                                    |
| Dunn 2004             | Outcome is behaviour change (use of seat belts) rather than disability                                                                                                                                     |
| Ehlers 2003           | Treatment of PTSD                                                                                                                                                                                          |
| Evans 1998            | Treatment rather than prevention of disability and cannot disaggregate those who suffered a traumatic injury from participants with other disabling conditions                                             |
| Evans 2001            | Update of <a href="#">Evans 1998</a> trial. Treatment rather than prevention of disability and cannot disaggregate those who suffered a traumatic injury from participants with other disabling conditions |
| Fauerbach 2002        | Outcome is not disability but reduction in pain during dressing change for a burns wound                                                                                                                   |
| Fecteau 1999          | Treatment of PTSD following a motor vehicle accident                                                                                                                                                       |
| Foa 1995              | Not RCT                                                                                                                                                                                                    |
| Fronek 2005           | Participants have not suffered a traumatic physical injury (staff training intervention)                                                                                                                   |
| Girolami 2005         | Not RCT                                                                                                                                                                                                    |
| Hagglund 2007         | Outcome is not disability but rate of re-injury                                                                                                                                                            |
| Hagsten 2006          | Intervention is physiotherapy, not psychosocial                                                                                                                                                            |
| Hazard 2000           | Participants have not suffered a traumatic physical injury                                                                                                                                                 |
| Jensen 2001           | Patients have not suffered a recent injury and the intervention is complex and the psychosocial component cannot be disaggregated                                                                          |
| Kennedy 2003          | Not RCT (control group data taken from an existing database)                                                                                                                                               |
| King 1999             | Not RCT (matched controls)                                                                                                                                                                                 |
| Kwon 2006             | Not RCT (controls and intervention group matched)                                                                                                                                                          |



(Continued)

|                       |                                                                                                                                                                                              |
|-----------------------|----------------------------------------------------------------------------------------------------------------------------------------------------------------------------------------------|
| Latimer 2006          | Patients have not suffered a recent injury                                                                                                                                                   |
| Lindstrom 1992        | The intervention is complex and the psychosocial component cannot be disaggregated                                                                                                           |
| McFarlane 2006        | Outcome is not disability but prevention of domestic violence                                                                                                                                |
| Melnyk 2004           | Unable to disaggregate those who suffered a traumatic injury from participants with other disabling conditions                                                                               |
| Menzel 2006           | Participants have not suffered a traumatic physical injury                                                                                                                                   |
| Miller 1975           | Not RCT (patient choice as to which group they were assigned)                                                                                                                                |
| Mitchell 1994         | Complex intervention including physiotherapy, work conditioning and counselling. Unable to disaggregate effects of psychosocial component. First report of <a href="#">Corey 1996</a> study. |
| Moore 1983            | Treatment of burn wounds rather than prevention of disability                                                                                                                                |
| Norman 2004           | Patients have not suffered a recent injury (chronic pelvic pain)                                                                                                                             |
| Oliveira 2006         | Not RCT (alternate allocation)                                                                                                                                                               |
| Ottosson 2007         | The intervention is complex and the psychosocial component cannot be disaggregated                                                                                                           |
| Pain 2007             | The intervention is complex and the psychosocial component cannot be disaggregated                                                                                                           |
| Phillips 2001         | The intervention is complex and the psychosocial component cannot be disaggregated                                                                                                           |
| Porritt 1979          | Not RCT (sequential allocation). Same study as <a href="#">Bordow 1979</a>                                                                                                                   |
| Ross 1996             | Not RCT (alternate allocation)                                                                                                                                                               |
| Rotem-Lehrer 2007     | Treatment of ankle sprain rather than prevention of disability                                                                                                                               |
| Rottkamp 1976         | Intervention is physiotherapy rather than psychosocial                                                                                                                                       |
| Rowland 2006          | The intervention is complex and the psychosocial component cannot be disaggregated                                                                                                           |
| Scholes 2007          | Treatment rather than prevention as patients screened for acute stress disorder                                                                                                              |
| Scholten-Peeters 2006 | Treatment for the symptoms of whiplash                                                                                                                                                       |
| Sirles 1991           | Participants have not suffered a traumatic physical injury                                                                                                                                   |
| Smith 1984            | Outcome is not disability but prevention of child abuse                                                                                                                                      |
| Soderstrom 2007       | Outcome is not disability but prevention of at-risk drinking                                                                                                                                 |

(Continued)

|                |                                                                                                                                        |
|----------------|----------------------------------------------------------------------------------------------------------------------------------------|
| Söderlund 2007 | Treatment for the symptoms of whiplash                                                                                                 |
| Ventegodt 2004 | The intervention is complex and the psychosocial component cannot be disaggregated                                                     |
| Vick 2001      | Not RCT                                                                                                                                |
| Vick 2004      | Not RCT                                                                                                                                |
| Wagner 2007    | Treatment for PTSD and depression                                                                                                      |
| Wise 2002      | The intervention is complex and the psychosocial component cannot be disaggregated                                                     |
| Yates 2000     | Not RCT                                                                                                                                |
| Zatzick 2004   | Treatment of PTSD                                                                                                                      |
| Zemper 2003    | The intervention is complex and the psychosocial component cannot be disaggregated. Not all patients suffered a recent physical injury |

PTSD = post-traumatic stress disorder

RCT = randomised controlled trial

### Characteristics of studies awaiting assessment *[ordered by study ID]*

#### Humphreys 2003

|               |                         |
|---------------|-------------------------|
| Methods       | -                       |
| Participants  | -                       |
| Interventions | -                       |
| Outcomes      | -                       |
| Notes         | Unable to locate study. |

#### McKinlay 2003

|               |   |
|---------------|---|
| Methods       | - |
| Participants  | - |
| Interventions | - |
| Outcomes      | - |

**McKinlay 2003** (Continued)

|       |                         |
|-------|-------------------------|
| Notes | Unable to locate study. |
|-------|-------------------------|

**Tecic unpublished**

|               |                                                                                                                      |
|---------------|----------------------------------------------------------------------------------------------------------------------|
| Methods       | RCT                                                                                                                  |
| Participants  | 113 severely injured trauma patients from 4 German trauma centres                                                    |
| Interventions | Short and long-term (up to 6 months post-discharge) psychotherapy compared to short-term (in hospital) psychotherapy |
| Outcomes      | Depression, anxiety, PTSD                                                                                            |
| Notes         | Unpublished study                                                                                                    |
