# Supplementary material
Source: PubMed Central journal article supplement (PMC3428876)
Supplement: NIHMS49378-supplement-supp2.pdf [file NIHMS49378-supplement-supp2.pdf]

## DATA AND ANALYSES

This review has no analyses.

## APPENDICES

### Appendix I. Search strategies

#### Cochrane Injuries Group Specialised Register (searched 5 Feb 2008)

((wound\* OR injur\* OR trauma OR damag\*) AND (physical\*)) AND (psychosocial or psycho-social OR interpersonal OR psychotherap\* OR cognitive OR counsel\* OR psychoanalys\* OR psychodrama)

#### CENTRAL (The Cochrane Library 2009, Issue 1)

#1MeSH descriptor Wounds and Injuries explode all trees

#2MeSH descriptor Spinal Cord Injuries explode all trees

#3MeSH descriptor Spinal Injuries explode all trees

#4MeSH descriptor Multiple Trauma explode all trees

#5MeSH descriptor Traumatology explode all trees

#6MeSH descriptor Injury Severity Score explode all trees

#7MeSH descriptor Abbreviated Injury Scale explode all trees

#8MeSH descriptor Trauma Severity Indices explode all trees

#9(wound\* or injur\* or trauma\* or damag\*) near (physical\*)

#10(#1 OR #2 OR #3 OR #4 OR #5 OR #6 OR #7 OR #8 OR #9)

#11MeSH descriptor Psychotherapy explode all trees

#12MeSH descriptor Counseling explode all trees

#13(psychosocial or psycho-social)

#14(behavior\* or behaviour\* or family or families or cognitive or psycho\*) near (therapy or therapies)

#15(behavior\* or behaviour\*) near (cognitive next therap\*)

#16(interpersonal or psychotherapy\* or “problem solving” or operant\* or reinforcement\* or biofeedback\* or “social skill” or “social skills” or “cognitive behavioral” or “discussion group” or “insight oriented” or “client centered” or counsel\* or insight\* or paradox\* or psychoanalys\* or psychodrama\* or “role play” or “role playing” or transactional or befriend\* or mentor\* or “social support”)

#17(psychological) near (debrief\*)

#18(discussion) near (group\*)

#19(#11 OR #12 OR #13 OR #14 OR #15 OR #16 OR #17 OR #18)

#20(#10 AND #19)

#21MeSH descriptor Craniocerebral Trauma explode all trees

#22(wound\* or injur\* or trauma\* or damag\*) near (head or crani\* or capitis or brain\* or forebrain\* or skull\* or hemisphere or intracran\* or orbit\* or cerebr\*)

#23(#21 OR #22)

#24(#20 AND NOT #23)

#### MEDLINE (Ovid SP) 1950 to Jan (week 5) 2008

1.“wounds and injuries”/co, px, rh, th [Classification, Complications, Psychology, Rehabilitation, Therapy]

2.spinal cord injuries/co, px, rh, th [Classification, Complications, Psychology, Rehabilitation, Therapy]

3.spinal injuries/cl, co, rh, th, px [Classification, Complications, Rehabilitation, Therapy, Psychology]

4.multiple trauma/cl, co, px, rh, th [Classification, Complications, Psychology, Rehabilitation, Therapy]

5.exp traumatology/

6.exp injury severity score/

7.exp abbreviated injury scale/

8.exp trauma severity indices/  
9.((wound\* or injur\* or trauma\* or damag\*) adj5 physical\*).ti,ab.  
10.or/1-9  
11.exp psychotherapy/  
12.exp counseling/  
13.(psychosocial or psycho-social).mp. [mp=title, original title, abstract, name of substance word, subject heading word]  
14.((behavior\* or behaviour\* or family or families or cognitive or psycho\*) adj3 (therapy or therapies)).ti,ab.  
15.((behavior\* or behaviour\*) adj3 (cognitive adj1 therap\*)).ti,ab.  
16.(interpersonal or psychotherap\* or “problem solving” or operant\* or reinforcement\* or biofeedback\* or “social skill” or “social skills” or “cognitive behavioral” or “discussion group” or “insight oriented” or “client centered” or counsel\* or insight\* or paradox\* or psychoanalys\* or psychodrama\* or “role play” or “role playing” or transactional or befriend\* or mentor\* or “social support”).ti,ab.  
17.(psychological adj1 debrief\*).ti,ab.  
18.(discussion adj1 group\*).ti,ab.  
19.or/11-18  
20.((wound\* or injur\* or trauma\* or damag\*) adj5 (head or crani\* or capitis or brain\* or forebrain\* or skull\* or hemisphere or intracran\* or orbit\* or cerebr\*)).ti,ab.  
21.exp craniocerebral trauma/  
22.20 or 21  
23.10 and 19  
24.23 not 22  
25.randomi?ed.ab,ti.  
26.randomized controlled trial.pt.  
27.controlled clinical trial.pt.  
28.placebo.ab.  
29.clinical trials as topic.sh.  
30.randomly.ab.  
31.trial.ti.  
32.25 or 26 or 27 or 28 or 29 or 30 or 31  
33.humans.sh.  
34.32 and 33  
35.24 and 34

#### **EMBASE (Ovid SP) 1980 to (week 5) Jan 2008**

1.Injury/co, rh, si, th [Complication, Rehabilitation, Side Effect, Therapy]  
2.exp Spine Injury/co, rh, si, th [Complication, Rehabilitation, Side Effect, Therapy]  
3.exp traumatology/  
4.\*Injury Scale/  
5.((wound\$ or injur\$ or trauma\$ or damag\$) adj5 physical\$).ti,ab.  
6.or/1-5  
7.exp psychotherapy/  
8.exp counseling/  
9.((psychosocial or psycho-social).ti,ab.  
10.((behavior\$ or behaviour\$ or family or families or cognitive or psycho\$) adj3 (therapy or therapies)).ti,ab.  
11.((behavior\$ or behaviour\$) adj3 (cognitive adj1 therap\$)).ti,ab.  
12.(psychological adj1 debrief\$).ti,ab.  
13.(discussion adj1 group\$).ti,ab.  
14.(interpersonal or psychotherap\$ or “problem solving” or operant\$ or reinforcement\$ or biofeedback\$ or “social skill” or “social skills” or “cognitive behavioral” or “discussion group” or “insight oriented” or “client centered” or counsel\$ or insight\$ or paradox\$ or psychoanalys\$ or psychodrama\$ or “role play” or “role playing” or transactional or befriend\$ or mentor\$ or “social support”).ti,ab.  
15.or/7-14  
16.6 and 15  
17.exp Head Injury/

18.((wound\$ or injur\$ or trauma\$ or damag\$) adj5 (head or crani\$ or capitis or brain\$ or forebrain\$ or skull\$ or hemisphere or intracran\$ or orbit\$ or cerebr\$)).ti,ab.  
 19.17 or 18  
 20.16 not 19  
 21.exp clinical study/  
 22.exp Clinical Trial/  
 23.randomized.ab,ti.  
 24.placebo.ti,ab.  
 25.randomly.ab,ti.  
 26.trial.ab,ti.  
 27.groups.ti,ab.  
 28.or/ 21-27  
 29.exp animal/  
 30.exp human/  
 31.29 not (29 and 30)  
 32.28 not 31  
 33.20 and 32

#### **PsycINFO (Ovid SP) 1806 to Jan (week 5) 2008**

1.Explode Wounds  
 2.Explode Electrical-Injuries  
 3.Explode Injuries  
 4.Explode Spinal-Cord-Injuries  
 5.((wound\* or injur\* or trauma\* or damag\*) near physical\*) in AB )or( ((wound\* or injur\* or trauma\* or damag\*) near physical\*) in TI )  
 6.#1 or #2 or #3 or #4 or #5  
 7.explode Psychotherapy  
 8.explode "Counseling-"  
 9.((psychosocial or psycho-social) near (therapy or therapies)) in AB )or( ((psychosocial or psycho-social) near (therapy or therapies)) in TI )  
 10.((behavior\* or behaviour\* or family or families or cognitive or psycho\*) near (therapy or therapies)) in AB )or( ((behavior\* or behaviour\* or family or families or cognitive or psycho\*) near (therapy or therapies)) in TI )  
 11.((behavior\* or behaviour\*) near (cognitive therap\*)) in AB )or( ((behavior\* or behaviour\*) near (cognitive therap\*)) in TI )  
 12.(interpersonal or psychotherapy\* or "problem solving" or operant\* or reinforcement\* or biofeedback\* or "social skill" or "social skills" or "cognitive behavioral" or "discussion group" or "insight oriented" or "client centered" or counsel\* or insight\* or paradox\* or psychoanalys\* or psychodrama\* or "role play" or "role playing" or transactional or befriend\* or mentor\* or "social support")near ((wound\* or injur\* or trauma\* or damag\*) near (physical\*))  
 13.(psychological near debrief\*)  
 14.(discussion near group\*)  
 15.#7 or #8 or #9 or #10 or #11 or #12 or #13 or #14  
 16.#6 and #15  
 17.explode "Head-Injuries"  
 18.explode "Self-Inflicted-Wounds"  
 19.((wound\* or injur\* or trauma\* or damag\*) near (head or crani\* or capitis or brain\* or forebrain\* or skull\* or hemisphere or intracran\* or orbit\* or cerebr\*)) in AB )or( ((wound\* or injur\* or trauma\* or damag\*) near (head or crani\* or capitis or brain\* or forebrain\* or skull\* or hemisphere or intracran\* or orbit\* or cerebr\*)) in TI )  
 20.#17 or #18 or #19  
 21.#16 not #20  
 22.random\*  
 23.(singl\* or doubl\* or trebl\* or tripl\*) near (blind\* or dummy or mask\*)  
 24.placebo\*  
 25.crossover  
 26.assign\*

27.allocat\*  
28.(clin\* or control\* or compar\* or evaluat\* or prospectiv\*) near (trial\* or studi\* or study)  
29.explode placebo/  
30.explode treatment effectiveness evaluation/  
31.explode mental health program evaluation/  
32.explode experimental design/  
33.#22 or #23 or #24 or #25 or #26 or #27 or #28 or #29 or #30 or #31 or #32  
34.21 and 33

**Controlled Trials metaRegister ([www.controlled-trials.com](http://www.controlled-trials.com)) (Searched 5 Feb 2008)**

((wound\* OR injur\* OR trauma OR damag\*) AND (physical\*)) AND (psychosocial or psycho-social OR interpersonal OR psychotherap\* OR cognitive OR counsel\* OR psychoanalys\* OR psychodrama)

**AMED (Allied & Complementary Medicine) (1985 to 6 Feb 2008)**

#1psychotherapy or counseling  
#2psychosocial or psycho-social  
#3(behaviour or behavior or family or families or cognitive or psycho\* or cognitive) next (therapy or therapies)  
#4discussion next (group or groups)  
#5#1 or #2 or #3 or #4  
#6wound or wounds or injury or injuries or trauma  
#7traumatology  
#8physical\* near damage\*  
#9#6 or #7 or #8  
#10#5 and #9  
#11(wound\* or injur\* or trauma\* or damag\*) near (head or crani\* or brain\* or forebrain or skull\* or intracran\* or orbit\* or cereb\*)  
#12#10 not #11  
#13(singl\* or doubl\* or trebl\* or tripl\*) near (blind\* or dummy or mask\*)  
#14(clin\* or control\* or compar\* or evaluat\* or prospectiv\* or random\*) near (study or studies or trial\* or group\* or allocate\* or assign\* or crossover)  
#15#16 or #17  
#16#14 and #18

**ISI Web of Science: Social Sciences Citation Index (SSCI) 1970 to Feb 2008**

1.(wound\* or injur\* or trauma\* or damag\*) AND physical\*) OR Spinal-Cord-Injuries  
2.Psychotherapy OR Counseling OR psychosocial OR psycho-social) OR ((behavior\* or behaviour\* or family or families or cognitive or psycho\*) AND (therapy or therapies)) OR (psychological AND debrief\*) OR (discussion AND group\*)  
3.random\* OR ((singl\* or doubl\* or trebl\* or tripl\*) AND (blind\* or dummy or mask\*)) OR placebo\* OR crossover OR assign\* OR allocat\*  
4.1 AND 2 AND 3

**PubMed [[www.ncbi.nlm.nih.gov/sites/entrez/](http://www.ncbi.nlm.nih.gov/sites/entrez/)] (searched PUBMED (from 2006 to Feb 2008))**

#1“Spinal Cord Injuries”[Mesh] OR “Wounds and Injuries”[Mesh] OR “Spinal Injuries”[Mesh] OR “Multiple Trauma”[Mesh] OR “Traumatology”[Mesh] OR “Injury Severity Score”[Mesh] OR “Abbreviated Injury Scale”[Mesh] OR “Trauma Severity Indices”[Mesh]  
#2(wound\* OR injur\* OR trauma OR damag\*) AND (physical\*).TI.  
#3(wound\* OR injur\* OR trauma OR damag\*) AND (physical\*).AB.  
#4#1 or #2 or #3  
#5“Psychotherapy”[Mesh] OR “Counseling”[Mesh]  
#6(psychosocial or psycho-social OR interpersonal OR psychotherap\* OR problem solving OR operant\* OR reinforcement\* OR biofeedback\* OR social skill OR social skills OR cognitive behavioral OR discussion group OR Insight oriented OR client centered OR counsel\* OR insight\* OR paradox\* OR psychoanalys\* OR psychodrama\* OR role play OR role playing OR transactional OR befriend\* OR mentor\* OR social support OR psychological debrief\* OR discussion group\*).TI.  
#7(psychosocial or psycho-social OR interpersonal OR psychotherap\* OR problem solving OR operant\* OR reinforcement\* OR biofeedback\* OR social skill OR social skills OR cognitive behavioral OR discussion group OR Insight oriented OR client centered

OR counsel\* OR insight\* OR paradox\* OR psychoanalys\* OR psychodrama\* OR role play OR role playing OR transactional OR befriend\* OR mentor\* OR social support OR psychological debrief\* OR discussion group\*).AB.

#8(behavior\* OR behaviour\* OR family OR families OR cognitive OR psycho\*) AND (therapy OR therapies OR cognitive).TI.

#9(behavior\* OR behaviour\* OR family OR families OR cognitive OR psycho\*) AND (therapy OR therapies OR cognitive).AB.

#10#5 OR #6 OR #7 OR #8 OR #9

#11(randomised OR randomized OR randomly OR random order OR random sequence OR random allocation OR randomly allocated OR at random OR randomized controlled trial [pt] OR controlled clinical trial [pt] OR randomized controlled trials [mh]) NOT ((models, animal[mh] OR Animals[mh] OR Animal Experimentation[mh] OR Disease Models, Animal[mh] OR Animals, Laboratory[mh]) NOT (Humans[mh]))

#12#4 AND #10 AND #11

## **HISTORY**

Protocol first published: Issue 1, 2007

Review first published: Issue 4, 2009

## **CONTRIBUTIONS OF AUTHORS**

MM and MDS were jointly responsible for reviewing papers and writing the review.

MDS was responsible for co-ordinating the overall review process, the collation of review papers and for communication with co-authors regarding their feedback.

DD was responsible for offering a third opinion on any disputes between MM and MDS regarding their reviewing of papers.

DD, US, MB, VP and PG were responsible for commenting on the protocol and the final review, and confirming the inclusion of key papers in the area.

## **DECLARATIONS OF INTEREST**

None known.

## **SOURCES OF SUPPORT**

### **Internal sources**

- No sources of support supplied

## External sources

- Malcolm MacLachlan, Health Research Board (All-Ireland) Cochrane Fellowship, Ireland.
- Mary J De Silva, ESRC/MRC Interdisciplinary Post Doctoral Fellowship, UK.
- Vikram Patel, UK.

Wellcome Trust Senior Clinical Research Fellowship in Tropical Medicine.

## DIFFERENCES BETWEEN PROTOCOL AND REVIEW

The following text was added:

Secondary outcomes: health care utilisation.

Searching other resources: the reference sections of all selected papers were screened for additional studies.

Because of the types of trials identified, we conducted no quantitative analysis and completed the review using a qualitative summary. Should there be trials in the future that enable a quantitative analysis, these will be performed as per the original protocol.

## INDEX TERMS

### Medical Subject Headings (MeSH)

Depression [prevention & control]; Disabled Persons [\* psychology]; Interpersonal Relations; Mental Disorders [\* prevention & control]; Pamphlets; Psychotherapy [\* methods]; Randomized Controlled Trials as Topic; Self Care [methods]; Social Support; Stress Disorders, Post-Traumatic [prevention & control]; Wounds and Injuries [\* psychology]

### MeSH check words

Humans
